# Supplementary material
Source: MDPI journal article supplement (https://www.mdpi.com/2227-7390/10/24/4748)
Supplement: s1 [file s1]

## Additional file 3 — Figure S2

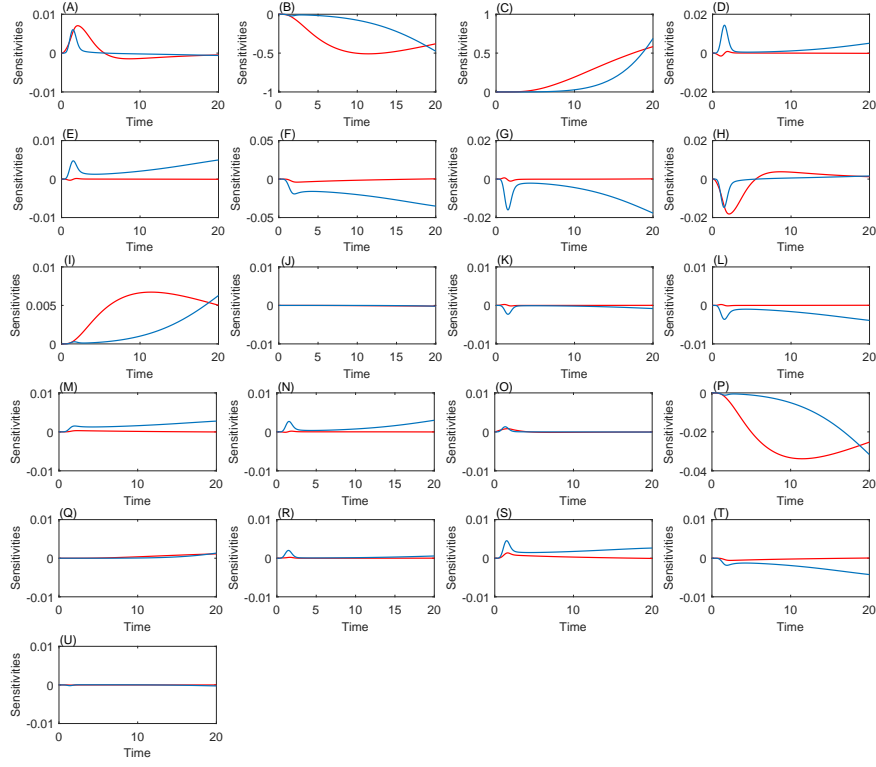

Figure S2: Sensitivity analysis for the 21 model parameters in the model of the MAP kinase pathway. (A)~(U): Dynamic of derivatives of the solutions with respect to  $a_1 \sim k_7$ . (Red-line: ppMEK; blue-line: ppERK.)
