# Supplementary material
Source: MDPI journal article supplement (https://www.mdpi.com/2227-7390/10/24/4748)
Supplement: s1 [file s1]

## Additional file 2 — Figure S1

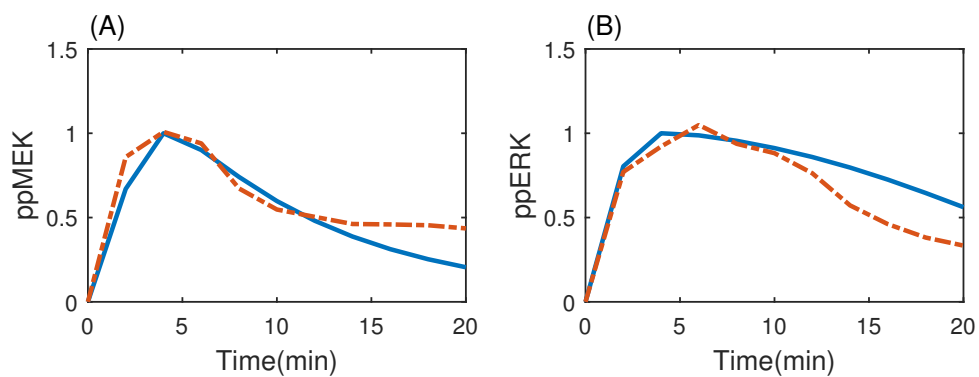

Figure S1: Comparison of experimental data and simulation using the estimated model parameters for the MAP kinase pathway. A. ppMEK. B. ppERK. (Solid-line: simulation, dash-dot-line: experimental data).
