# Supplementary material
Source: MDPI journal article supplement (https://www.mdpi.com/2227-7390/10/24/4748)
Supplement: s1 [file s1]

# Additional file 4 — Table S1

Table S1: Estimated model parameters for the MAP kinase pathway. Estimated value: the estimated value for each parameter. STD: standard deviation of the 100 estimates in the final generation.  $[W_{min}, W_{max}]$ : prior distribution of each parameter.

| <b>Kinetic rates</b>        | $a_1$   | $a_2$   | $a_3$   | $a_4$   | $a_5$   | $a_6$   | $a_7$   |
|-----------------------------|---------|---------|---------|---------|---------|---------|---------|
| <b>Estimated value</b>      | 66.0452 | 0.9584  | 0.0121  | 15.3943 | 35.7607 | 5.7297  | 5.0556  |
| <b>STD</b>                  | 13.7871 | 0.6568  | 0.0031  | 0.3849  | 0.9216  | 0.1316  | 2.0026  |
| <b><math>W_{min}</math></b> | 20      | 0       | 0       | 10      | 25      | 1       | 0       |
| <b><math>W_{max}</math></b> | 120     | 5       | 0.05    | 20      | 50      | 10      | 15      |
| <b>Kinetic rates</b>        | $d_1$   | $d_2$   | $d_3$   | $d_4$   | $d_5$   | $d_6$   | $d_7$   |
| <b>Estimated value</b>      | 0.1176  | 60.4114 | 35.3809 | 36.2956 | 16.3216 | 44.2443 | 2.4649  |
| <b>STD</b>                  | 0.08    | 3.2385  | 1.2341  | 2.0504  | 0.6656  | 1.5363  | 0.0958  |
| <b><math>W_{min}</math></b> | 0       | 30      | 25      | 25      | 10      | 30      | 1       |
| <b><math>W_{max}</math></b> | 0.5     | 80      | 50      | 50      | 25      | 60      | 5       |
| <b>Kinetic rates</b>        | $k_1$   | $k_2$   | $k_3$   | $k_4$   | $k_5$   | $k_6$   | $k_7$   |
| <b>Estimated value</b>      | 25.248  | 12.1591 | 5.3689  | 59.3748 | 29.3347 | 28.6955 | 27.5407 |
| <b>STD</b>                  | 0.7066  | 0.4916  | 0.4452  | 3.551   | 1.6659  | 1.2889  | 0.553   |
| <b><math>W_{min}</math></b> | 20      | 5       | 1       | 40      | 20      | 20      | 20      |
| <b><math>W_{max}</math></b> | 50      | 20      | 10      | 80      | 50      | 50      | 50      |
